# Supplementary material for: Mapping Cancer in Africa: A Comprehensive and Comparable Characterization of 34 Cancer Types Using Estimates From GLOBOCAN 2020
Source: Frontiers journal article supplement (doi:10.3389/fpubh.2022.839835), 2022-04-25
Supplement: Data_Sheet_1.pdf [file Data_Sheet_1.pdf]

**Supplementary Table 1 Cancer Groups and ICD-10 Classification**

| <b>Cancer</b>                    | <b>ICD</b>  |
|----------------------------------|-------------|
| Bladder                          | C67         |
| Brain and Central Nervous System | C70-72      |
| Breast                           | C50         |
| Cervix Uteri                     | C53         |
| Colorectum                       | C18-21      |
| Corpus Uteri                     | C54         |
| Gallbladder                      | C23-24      |
| Hodgkin Lymphoma                 | C81         |
| Hypopharynx                      | C12-13      |
| Kaposi sarcoma                   | C46         |
| Kidney                           | C64-65      |
| Larynx                           | C32         |
| Leukemia                         | C91-95      |
| Lip and Oral Cavity              | C00-06      |
| Liver                            | C22         |
| Lung                             | C33-34      |
| Skin Melanoma                    | C43         |
| Mesothelioma                     | C45         |
| Multiple Myeloma                 | C88+C90     |
| Nasopharynx                      | C11         |
| Non-Hodgkin Lymphoma             | C82-86, C96 |
| Oesophagus                       | C15         |
| Oropharynx                       | C09-10      |
| Ovary                            | C56         |
| Pancreas                         | C25         |
| Penis                            | C60         |
| Prostate                         | C61         |
| Salivary Glands                  | C07-08      |
| Stomach                          | C16         |

| <b>Cancer</b>      | <b>ICD</b> |
|--------------------|------------|
| Testis             | C62        |
| Thyroid            | C73        |
| Vagina             | C52        |
| Vulva              | C51        |
| <b>All Cancers</b> | C00-97     |

**Supplementary Table 2 Sex-specific Burden of 34 Cancer Groups in Africa, 2020**

| Cancer                           | Males                               |                                     |              |             |             | Females                             |                                     |              |             |             |
|----------------------------------|-------------------------------------|-------------------------------------|--------------|-------------|-------------|-------------------------------------|-------------------------------------|--------------|-------------|-------------|
|                                  | Incidence                           | Mortality                           | ASIR         | ASMR        | MIR         | Incidence                           | Mortality                           | ASIR         | ASMR        | MIR         |
| <b>All cancers</b>               | <b>475,753</b><br>[386,823-585,128] | <b>323,883</b><br>[258,540-405,740] | <b>126.8</b> | <b>90.4</b> | <b>0.68</b> | <b>633,456</b><br>[525,277-763,915] | <b>387,546</b><br>[316,060-475,200] | <b>139.5</b> | <b>89.2</b> | <b>0.61</b> |
| Bladder                          | 23,996<br>[19,641-29,316]           | 13,502<br>[10,752-16,956]           | 7.2          | 4.4         | 0.56        | 9,200<br>[6,447-13,129]             | 5,245<br>[3,500-7,860]              | 2.3          | 1.3         | 0.57        |
| Brain and central nervous system | 9,666<br>[6,989-13,367]             | 8,058<br>[5,573-11,651]             | 2.1          | 1.9         | 0.83        | 8,598<br>[6,021-12,278]             | 7,099<br>[4,734-10,646]             | 1.7          | 1.5         | 0.83        |
| Breast                           |                                     |                                     |              |             |             | 186,598<br>[173,041-201,217]        | 85,787<br>[77,648-94,779]           | 40.7         | 19.4        | 0.46        |
| Cervix Uteri                     |                                     |                                     |              |             |             | 117,316<br>[105,999-129,842]        | 76,745<br>[68,380-86,133]           | 25.6         | 17.7        | 0.65        |
| Colorectum                       | 34,060                              | 22,046                              | 9.4          | 6.3         | 0.65        | 32,138                              | 20,829                              | 7.6          | 5           | 0.65        |
| Corpus Uteri                     |                                     |                                     |              |             |             | 14,024<br>[10,920-18,010]           | 4,042<br>[3,041-5,372]              | 3.5          | 1           | 0.29        |
| Gallbladder                      | 1,823<br>[762-4,358]                | 1,410<br>[523-3,800]                | 0.55         | 0.43        | 0.77        | 3,631<br>[1,974-6,680]              | 2,839<br>[1,419-5,678]              | 0.91         | 0.72        | 0.78        |
| Hodgkin lymphoma                 | 6,386<br>[4,300-9,483]              | 2,610<br>[1,665-4,092]              | 1.2          | 0.53        | 0.41        | 4,429<br>[2,771-7,079]              | 1,705<br>[1,000-2,906]              | 0.78         | 0.33        | 0.38        |
| Hypo pharynx                     | 1,353<br>[578-3,168]                | 965<br>[367-2,539]                  | 0.36         | 0.26        | 0.71        | 712<br>[234-2,164]                  | 474<br>[134-1,678]                  | 0.17         | 0.11        | 0.67        |
| Kaposi sarcoma                   | 16,192<br>[12,624-20,769]           | 8,472<br>[5,971-12,021]             | 3            | 1.6         | 0.52        | 8,818<br>[6,509-11,947]             | 4,594<br>[2,525-8,358]              | 1.5          | 0.78        | 0.52        |
| Kidney                           | 9,621<br>[6,782-13,649]             | 5,848<br>[3,929-8704]               | 2.1          | 1.4         | 0.61        | 8,097<br>[5,412-12,114]             | 5,002<br>[3,163-7,909]              | 1.5          | 0.98        | 0.62        |
| Larynx                           | 8,486<br>[6,079-11,845]             | 5,675<br>[3,883-8,293.2]            | 2.4          | 1.7         | 0.67        | 1,422<br>[608-3,325]                | 961<br>[366-2,525]                  | 0.33         | 0.23        | 0.68        |
| Leukaemia                        | 17,841<br>[14,044-22,665]           | 13,262<br>[10,102-17,411]           | 3.7          | 3.1         | 0.74        | 14,297<br>[10,933-18,696]           | 10,629<br>[7,834-14,421]            | 2.8          | 2.2         | 0.74        |
| Lip, oral cavity                 | 8,174<br>[5,994-11146]              | 4,606<br>[3,237-6,554]              | 2.1          | 1.3         | 0.56        | 6,112<br>[4,125-9,056]              | 3,482<br>[2,227-5,445]              | 1.4          | 0.85        | 0.57        |
| Liver                            | 45,142<br>[38,258-53,265]           | 42,740<br>[35,408-51,590]           | 11.8         | 11.3        | 0.95        | 25,400<br>[19,845-32,510]           | 24,204<br>[18,280-32,048]           | 6.1          | 5.9         | 0.95        |
| Lung                             | 33,282<br>[28,832-38,418]           | 29,760<br>[25,277-35,037]           | 9.8          | 8.9         | 0.89        | 12,706<br>[10,249-15,751]           | 11,411<br>[89,37-14,570]            | 3.2          | 2.9         | 0.9         |

|                      |                            |                           |      |      |      |                           |                           |      |      |      |
|----------------------|----------------------------|---------------------------|------|------|------|---------------------------|---------------------------|------|------|------|
| Melanoma of skin     | 3,111<br>[2,153-4,496]     | 1,193<br>[785-1,813]      | 0.88 | 0.36 | 0.38 | 3,852<br>[2,655-5,588]    | 1,486<br>[973-2,269]      | 0.93 | 0.37 | 0.39 |
| Mesothelioma         | 765<br>[360-1,624]         | 702<br>[298-1,653]        | 0.22 | 0.21 | 0.92 | 354<br>[109-1,148]        | 336<br>[88-1,281]         | 0.09 | 0.09 | 0.95 |
| Multiple myeloma     | 4,537<br>[2,892-7,117]     | 3,756<br>[2,251-6,268]    | 1.3  | 1.1  | 0.83 | 3,954<br>[2,463-6,348]    | 3,313<br>[1,934-5,676]    | 0.98 | 0.85 | 0.84 |
| Nasopharynx          | 6,527<br>[4,162-10,236]    | 4,278<br>[2,564-7,137]    | 1.5  | 1.1  | 0.66 | 3,514<br>[1,900-6,498]    | 2,322<br>[1,154-4,672]    | 0.7  | 0.51 | 0.66 |
| Non-Hodgkin lymphoma | 27,892<br>[23,021-33,794]  | 16,943<br>[13,620-21,077] | 6    | 4    | 0.61 | 22,624<br>[18,221-28,091] | 14,017<br>[10,958-17,929] | 4.6  | 3    | 0.62 |
| Oesophagus           | 15,034<br>[12,231-18,480]  | 14,286<br>[11,297-18,065] | 4.2  | 4    | 0.95 | 12,512<br>[9,713-16,117]  | 11,811<br>[8,856-15,753]  | 3.1  | 2.9  | 0.94 |
| Oropharynx           | 2,164<br>[1,094-4,281]     | 1,346<br>[620-2,924]      | 0.57 | 0.37 | 0.62 | 749<br>[229-2,452]        | 436<br>[113-1,679]        | 0.17 | 0.1  | 0.58 |
| Ovary                |                            |                           |      |      |      | 24,263<br>[19,547-30,117] | 17,008<br>[13,301-21,748] | 5.4  | 4    | 0.7  |
| Pancreas             | 9,239<br>[6,860-12,443]    | 8,936<br>[6,369-12,537]   | 2.7  | 2.6  | 0.97 | 7,831<br>[5,659-10,837]   | 7,613<br>[5,261-11,016]   | 2    | 1.9  | 0.97 |
| Penis                | 2,060<br>[1,013-4,191]     | 942<br>[420-2,113]        | 0.53 | 0.25 | 0.46 |                           |                           | 0    | 0    |      |
| Prostate             | 93,173<br>[83,906-103,463] | 47,249<br>[41,941-53,228] | 29.7 | 16.3 | 0.51 |                           |                           | 0    | 0    |      |
| Salivary glands      | 2,654<br>[1,340-5,258]     | 1,605<br>[737-3,493]      | 0.68 | 0.47 | 0.6  | 2,266<br>[1,092-4,703]    | 1,355<br>[590-3,109]      | 0.48 | 0.32 | 0.6  |
| Stomach              | 17,500<br>[13,621-22,484]  | 15,099<br>[11,354-20,079] | 4.9  | 4.3  | 0.86 | 14,902<br>[11,116-19,977] | 12,846<br>[9,204-17,928]  | 3.6  | 3.2  | 0.86 |
| Testis               | 3,302<br>[1,878-5,806]     | 1,084<br>[570-2,060]      | 0.61 | 0.24 | 0.33 |                           |                           | 0    | 0    |      |
| Thyroid              | 3,839<br>[2,342-6,293]     | 1,106<br>[630-1,940]      | 0.94 | 0.34 | 0.29 | 14,618<br>[11,219-19,047] | 3,337<br>[2,456-4,533]    | 3.1  | 0.85 | 0.23 |
| Vagina               |                            |                           |      |      |      | 2,001<br>[1,031-3,883]    | 1,102<br>[518-2,343]      | 0.45 | 0.26 | 0.55 |
| Vulva                |                            |                           |      |      |      | 5,144<br>[3,330-7,946]    | 2,858<br>[1,743-4,687]    | 1.1  | 0.66 | 0.56 |

Incidence: All-age new cases; Mortality: All-age deaths; ASIR: Age-standardized incidence rate (cases per 100 000); ASMR: Age-standardized mortality rate (deaths per 100 000); MIR: Mortality-to-incidence ratio. Data Source: GLOBOCAN 2020 (International Agency for Research on Cancer). The figures inside square brackets depict 95% uncertainty intervals.

**Supplementary Table 3 Cancer Infrastructure of African Countries**

|                                         |                                                 |                            | <b>Cervix Uteri</b> |            | <b>Breast Cancer</b> |                  | <b>Colorectal Cancer</b> |                    |
|-----------------------------------------|-------------------------------------------------|----------------------------|---------------------|------------|----------------------|------------------|--------------------------|--------------------|
| <b>Country</b>                          | <b>Cancer policy/<br/>strategy/ action plan</b> | <b>Cancer<br/>Registry</b> | <b>PAP</b>          | <b>VIA</b> | <b>CBE</b>           | <b>Mammogram</b> | <b>FOBT</b>              | <b>Colonoscopy</b> |
| Algeria                                 | 1                                               | 1                          | 1                   | 1          | 1                    | 1                | 0                        | 0                  |
| Angola                                  |                                                 |                            |                     |            |                      |                  |                          |                    |
| Benin                                   | 0                                               | 0                          | 0                   | 0          | 1                    | 1                | 0                        | 0                  |
| Botswana                                | 0                                               | 1                          | 1                   | 0          | 0                    | 1                | 0                        | 0                  |
| Burkina Faso                            | 0                                               | 1                          | 1                   | 0          | 1                    | 1                | 0                        | 1                  |
| Burundi                                 | 0                                               | 0                          | 0                   | 0          | 0                    | 0                | 0                        | 0                  |
| Cameroon                                | 1                                               | 1                          | 1                   | 1          | 1                    | 0                | 1                        | 0                  |
| Cape Verde                              |                                                 |                            |                     |            |                      |                  |                          |                    |
| Central African Republic                | 0                                               | 0                          | 1                   | 0          | 1                    | 0                | 0                        | 0                  |
| Chad                                    |                                                 |                            |                     |            |                      |                  |                          |                    |
| Comoros                                 | 0                                               | 0                          | 1                   | 0          | 1                    | 0                | 1                        | 0                  |
| Republic of the Congo                   | 1                                               | 1                          | 1                   | 1          | 1                    | 1                | 0                        | 1                  |
| Cote d'Ivoire                           | 1                                               | 1                          | 0                   | 0          | 0                    | 0                | 0                        | 0                  |
| The Democratic Republic of the<br>Congo |                                                 |                            |                     |            |                      |                  |                          |                    |
| Djibouti                                | 0                                               | 0                          | 0                   | 0          | 1                    | 1                | 0                        | 0                  |
| Egypt                                   | 0                                               | 1                          | 0                   | 1          | 1                    | 0                | 1                        | 0                  |
| Equatorial Guinea                       | 0                                               | 0                          | 0                   | DK         | 1                    | 0                | 0                        | 0                  |

|               |                                         |                    | Cervix Uteri |     | Breast Cancer |           | Colorectal Cancer |             |
|---------------|-----------------------------------------|--------------------|--------------|-----|---------------|-----------|-------------------|-------------|
| Country       | Cancer policy/<br>strategy/ action plan | Cancer<br>Registry | PAP          | VIA | CBE           | Mammogram | FOBT              | Colonoscopy |
| Eritrea       | 1                                       | 0                  | 0            | DK  | 0             | 0         | 0                 | 0           |
| Eswatini      | 0                                       | 1                  | 1            | 1   | 1             | 0         | 0                 | 0           |
| Ethiopia      |                                         |                    |              |     |               |           |                   |             |
| Gabon         | 0                                       | 1                  | 0            | 0   | 1             | 1         | 1                 | 1           |
| Ghana         | 1                                       | 1                  | 0            | 0   | 0             | 0         | 0                 | 0           |
| Guinea        | 1                                       | 1                  | 0            | 0   | 0             | 0         | 0                 | 0           |
| Guinea-Bissau | 0                                       | 0                  | 0            | 0   | 1             | 0         | 0                 | 0           |
| Kenya         | 1                                       | 1                  | 0            | 0   | 1             | 0         | 0                 | 0           |
| Lesotho       | 0                                       | 0                  | 0            | 0   | 0             | 0         | 0                 | 0           |
| Liberia       | 0                                       | 1                  | 0            | 0   | 1             | 1         | 0                 | 0           |
| Libya         | 0                                       | 0                  | 0            | 0   | 0             | 0         | 0                 | 0           |
| Madagascar    | 1                                       | 1                  | 0            | 0   | 0             | 0         | 0                 | 0           |
| Malawi        | 0                                       | 1                  | 0            | 1   | 0             | 0         | 0                 | 0           |
| Mali          | DK                                      | 1                  | 1            | 1   | 1             | 1         | 0                 | 0           |
| Mauritania    | 1                                       | 0                  | 0            | 0   | 0             | 0         | 0                 | 0           |
| Mauritius     |                                         |                    |              |     |               |           |                   |             |
| Morocco       | 1                                       | 1                  | 1            | 1   | 1             | 1         | 0                 | 1           |
| Mozambique    | 1                                       | 1                  | 0            | 1   | 1             | 0         | 0                 | 0           |
| Namibia       | DK                                      | 1                  | 1            | 0   | 1             | 1         | 1                 | DK          |
| Niger         | 0                                       | 1                  | 0            | 0   | 1             | 0         | 0                 | 0           |

|                       |                                         |                    | Cervix Uteri |              | Breast Cancer |              | Colorectal Cancer |             |
|-----------------------|-----------------------------------------|--------------------|--------------|--------------|---------------|--------------|-------------------|-------------|
| Country               | Cancer policy/<br>strategy/ action plan | Cancer<br>Registry | PAP          | VIA          | CBE           | Mammogram    | FOBT              | Colonoscopy |
| Nigeria               | 0                                       | 1                  | 0            | 0            | 0             | 0            | 0                 | 0           |
| Rwanda                | 1                                       | 0                  | 0            | 0            | 0             | 0            | 0                 | 0           |
| Sao Tome and Principe | 0                                       | 0                  | 1            | 0            | 0             | 0            | 0                 | 0           |
| Senegal               | 0                                       | 0                  | 1            | 1            | 1             | 1            | 0                 | 1           |
| Sierra Leone          |                                         |                    |              |              |               |              |                   |             |
| Somalia               | 0                                       | 0                  | 0            | 0            | 1             | 0            | 0                 | 0           |
| South Africa          |                                         |                    |              |              |               |              |                   |             |
| South Sudan           |                                         |                    |              |              |               |              |                   |             |
| Sudan                 | 1                                       | 1                  | 0            | 0            | 0             | 0            | 0                 | 0           |
| Tanzania              |                                         |                    |              |              |               |              |                   |             |
| The Gambia            | 0                                       | 1                  | 1            | 1            | 0             | 1            | 0                 | 0           |
| Togo                  | 1                                       | 1                  | 0            | 0            | 0             | 0            | 0                 | 0           |
| Tunisia               | 0                                       | 1                  | 0            | 0            | 1             | 1            | 0                 | 0           |
| Uganda                | 0                                       | 1                  | 0            | 0            | 1             | 1            | 0                 | 0           |
| Zambia                | 1                                       | 1                  | 0            | 0            | 0             | 0            | 0                 | 0           |
| Zimbabwe              | 0                                       | 1                  | 0            | 0            | 1             | 0            | 0                 | 1           |
| <b>TOTAL</b>          | <b>16/43</b>                            | <b>28/43</b>       | <b>14/43</b> | <b>11/43</b> | <b>25/43</b>  | <b>15/43</b> | <b>5/43</b>       | <b>6/43</b> |

Data Source: All the data is procured from WHO Cancer Country Profiles. The answer to the question: Cancer policy/ strategy/ action plan and cancer registry were responded as yes (1) or no (0). The answer to the question on screening availability was coded as: generally available at the public primary

health care level (1) and not generally available at the public primary health care level (0). DK stands for don't know. The countries without entry did not respond to the survey. PAP: pap smear; VIA: Visual inspection with acetic acid; CBE: Clinical breast exam; FOBT: Fecal occult blood test.

**Supplementary Table 4 Comparison of Cancer Infrastructure in Africa with other World Health Organization Regions**

| <b>Region</b>      | <b>Physician Density (per 100,000 population)</b> | <b>Nursing and Midwife Density (per 100,000 population)</b> | <b>Radiotherapy Units (per 1 million population)</b> |
|--------------------|---------------------------------------------------|-------------------------------------------------------------|------------------------------------------------------|
| <b>Global</b>      | <b>13.9</b>                                       | <b>28.6</b>                                                 | <b>1.8</b>                                           |
| Europe             | 32.1                                              | 80.2                                                        | 3.9                                                  |
| Americas           | 21.5                                              | 44.9                                                        | 5.3                                                  |
| Western Pacific    | 15.5                                              | 26.9                                                        | --                                                   |
| East Mediterranean | 12.7                                              | 18.0                                                        | 0.4                                                  |
| South-East Asia    | 5.9                                               | 15.3                                                        | 0.3                                                  |
| Africa             | 2.7                                               | 12.4                                                        | 0.1                                                  |

Data Source: Atlas of African Health Statistics 2016 (WHO).

## Supplementary Figures

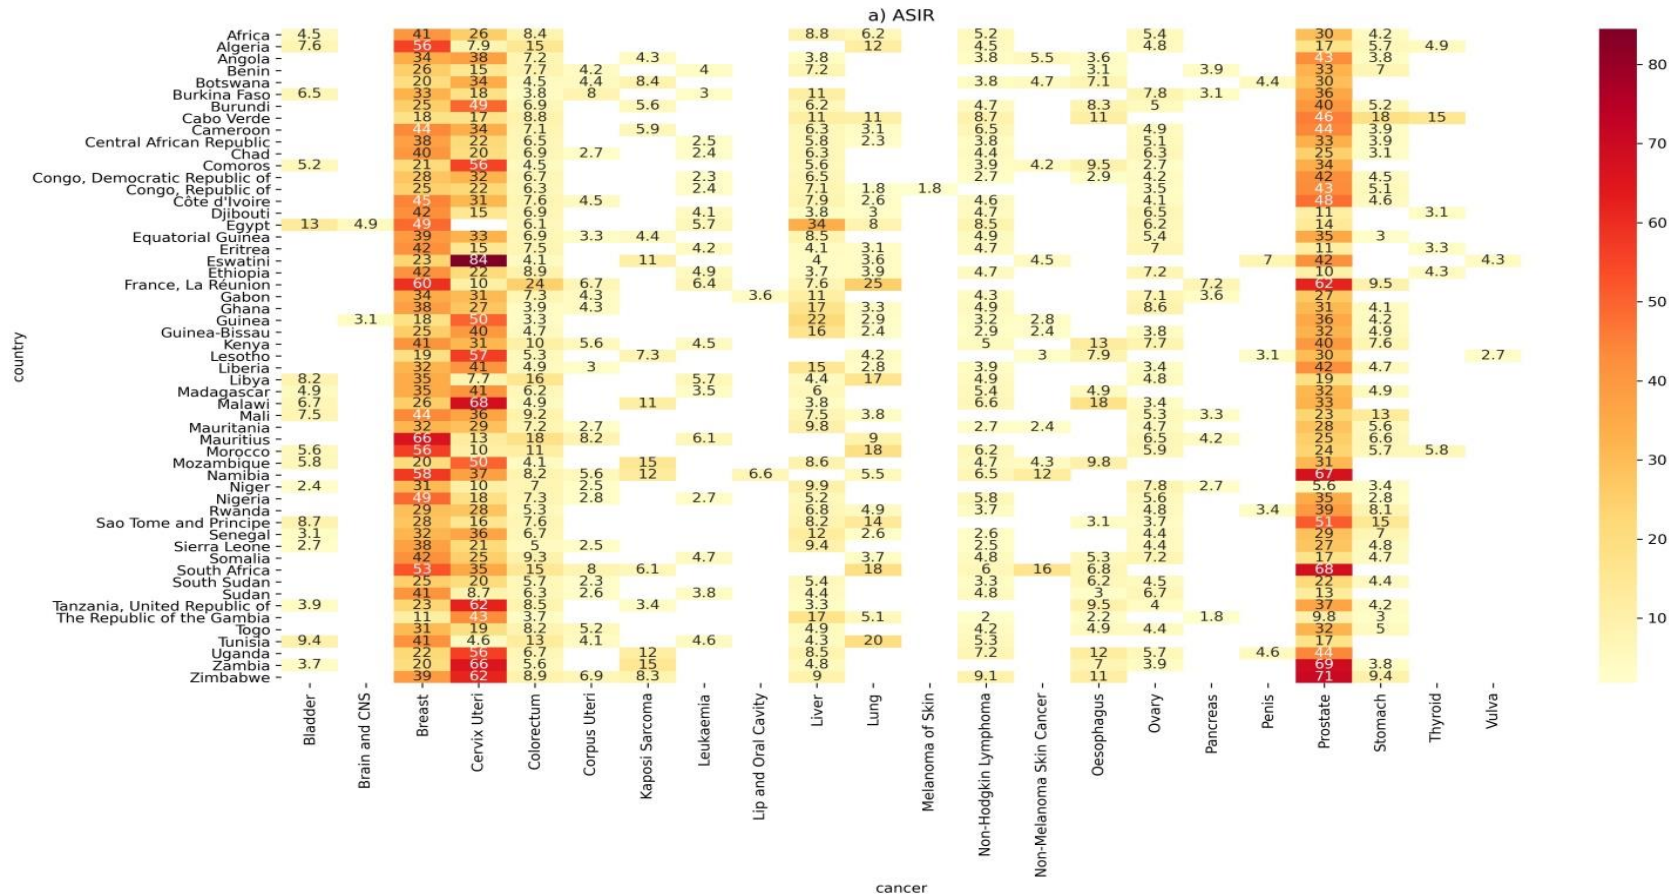

**Supplementary Figure 1 Top-ten Cancer Groups in 54 African Countries in terms of ASIR.**

The cancer groups in a country were ranked as per age-standardised incidence rate (ASIR) in the given country. The numbers in the cells represent the ASIR of a particular cancer group in that country. The color of the cell represents the ASIR, also varying from yellow (low) to dark red (very high), as indicated in the legend bar on the right.

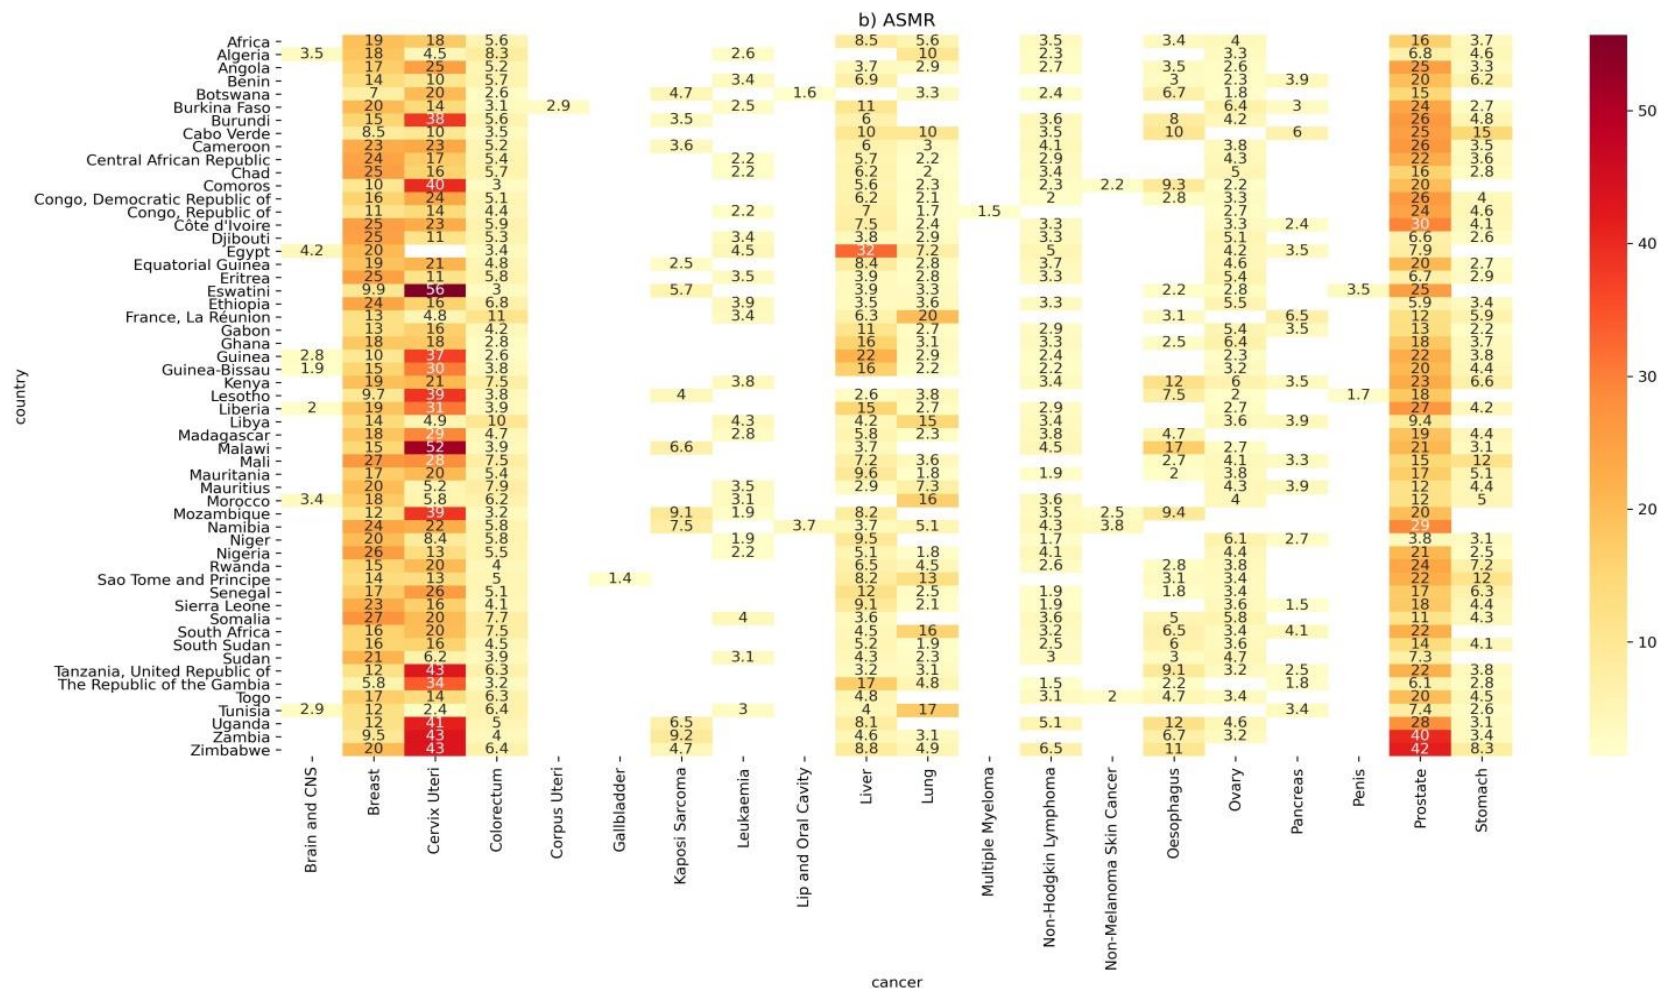

**Supplementary Figure 2 Top-ten Cancer Groups in 54 African Countries in terms of ASMR.**

The cancer groups in a country were ranked as per the age-standardized mortality rate (ASMR) in the given country. The numbers in the cells represent the ASMR of a particular cancer group in that country. The cell color represents the ASMR, also varying from yellow (low) to dark red (very high), as indicated in the legend bar on the right. Data Source: GLOBOCAN 2020 (International Agency for Research on Cancer).

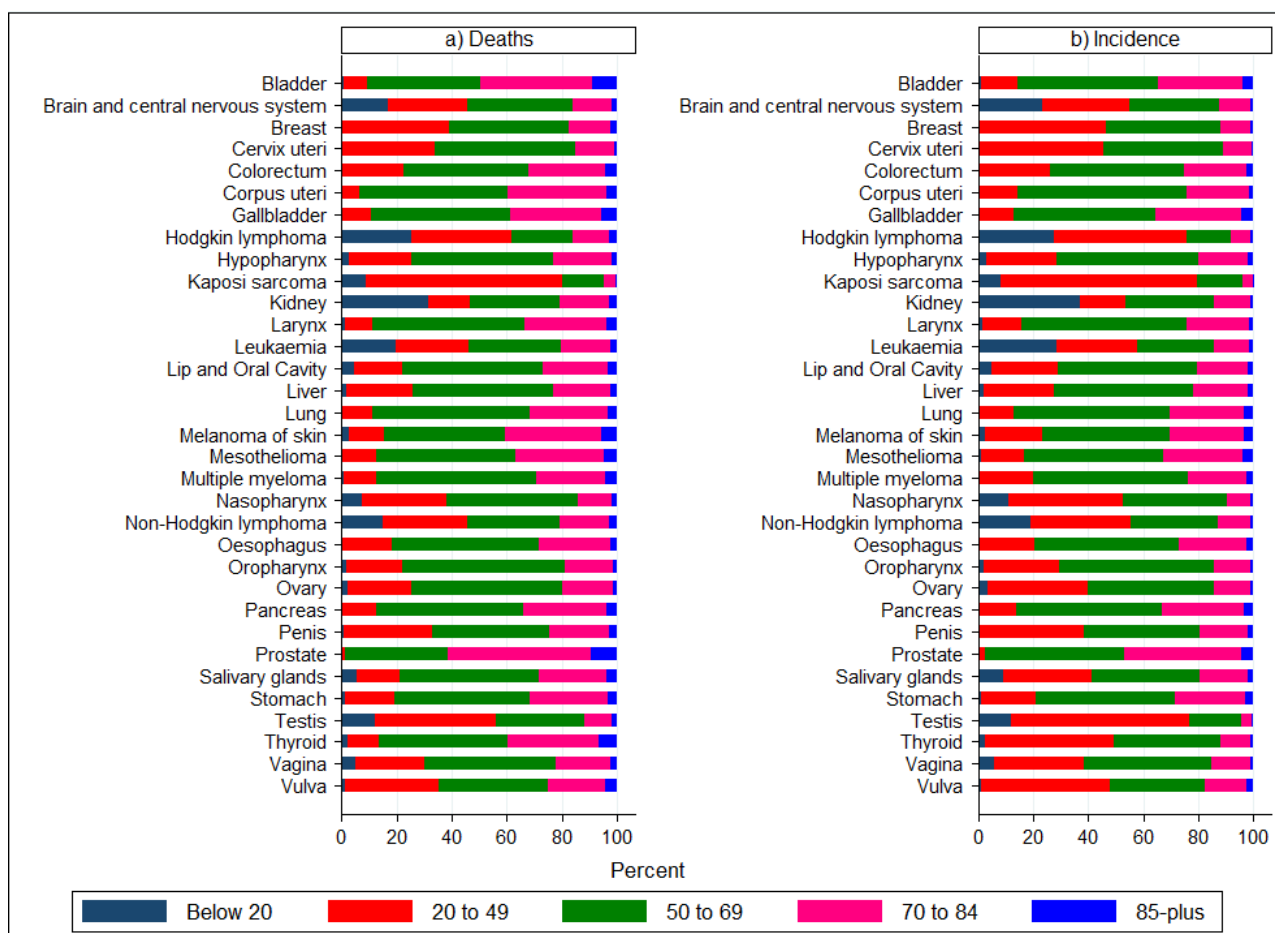

**Supplementary Figure 3 Age-Group wise Burden of 34 Cancer Groups in Africa, 2020 a) Deaths b) Incidence.**

Incidence: Age-group wise cases; Deaths: Age-group wise deaths. Data Source: GLOBOCAN 2020 (International Agency for Research on Cancer).

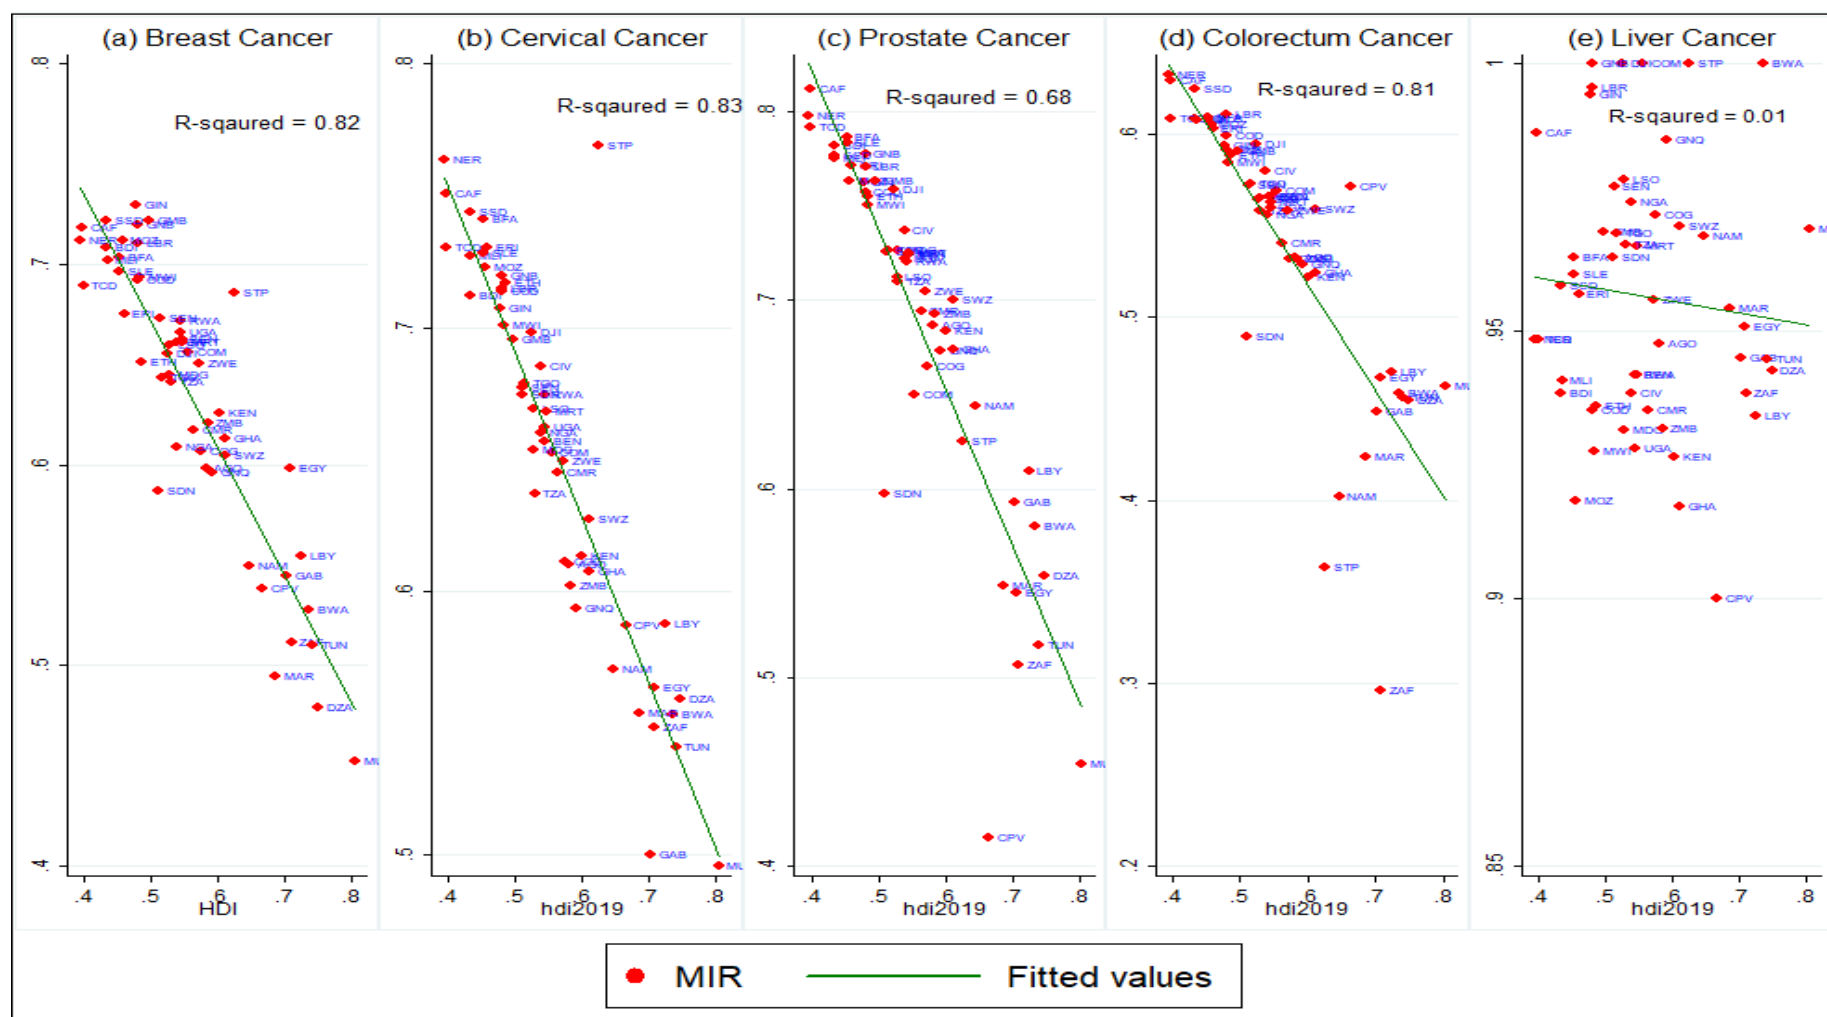

**Supplementary Figure 4 Association between HDI and MIR for the Top-5 Cancer Groups. a) Breast Cancer b) Cervical Cancer c) Prostate Cancer d) Colorectum Cancer e) Liver Cancer.** The dots on the scatter plot are marked as per the country's ISO-3 code. MIR: Mortality-to-Incidence Ratio; HDI: Human Development Index. Data Source: GLOBOCAN 2020 (International Agency for Research on Cancer). The data about HDI is procured from United Nations Development Program.

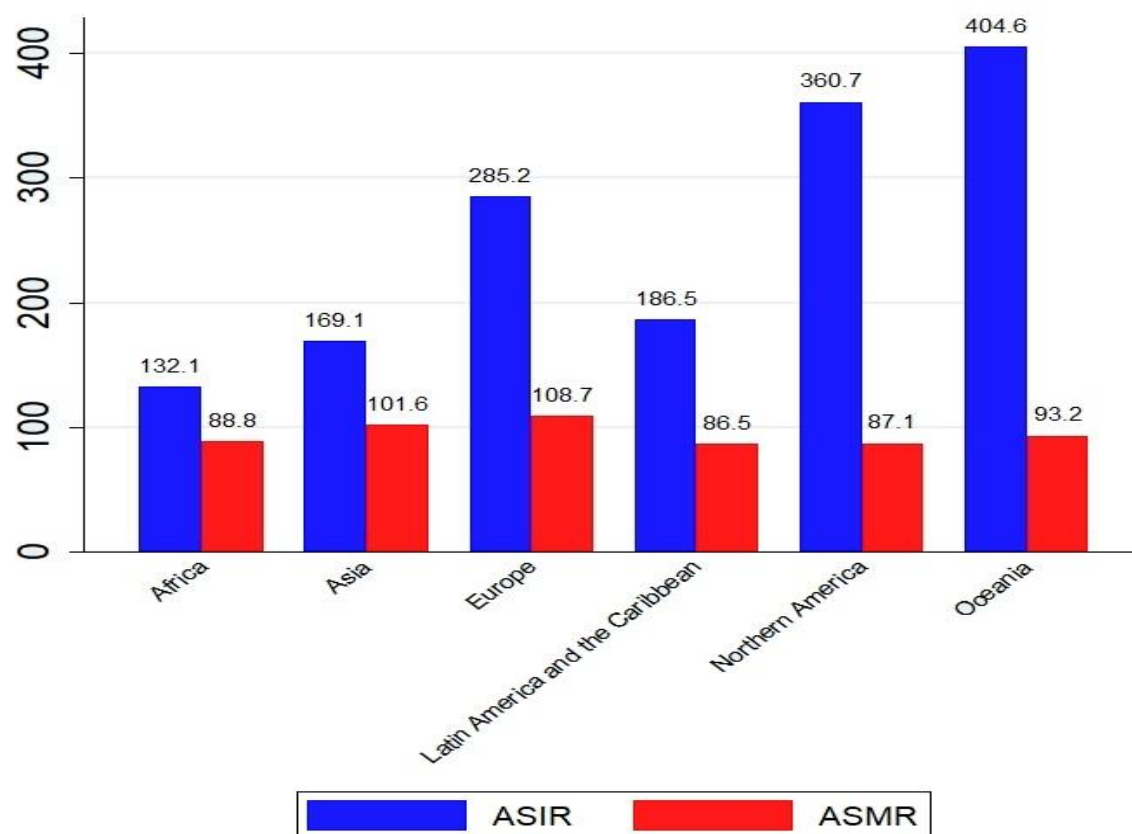

**Supplementary Figure 5 Comparison of Africa with Other Continents in terms of Age-standardized Rates.**

ASIR: Age-standardized incidence rate (cases per 100 000); ASMR: Age-standardized mortality rate (deaths per 100 000). Data Source: GLOBOCAN 2020 (International Agency for Research on Cancer)

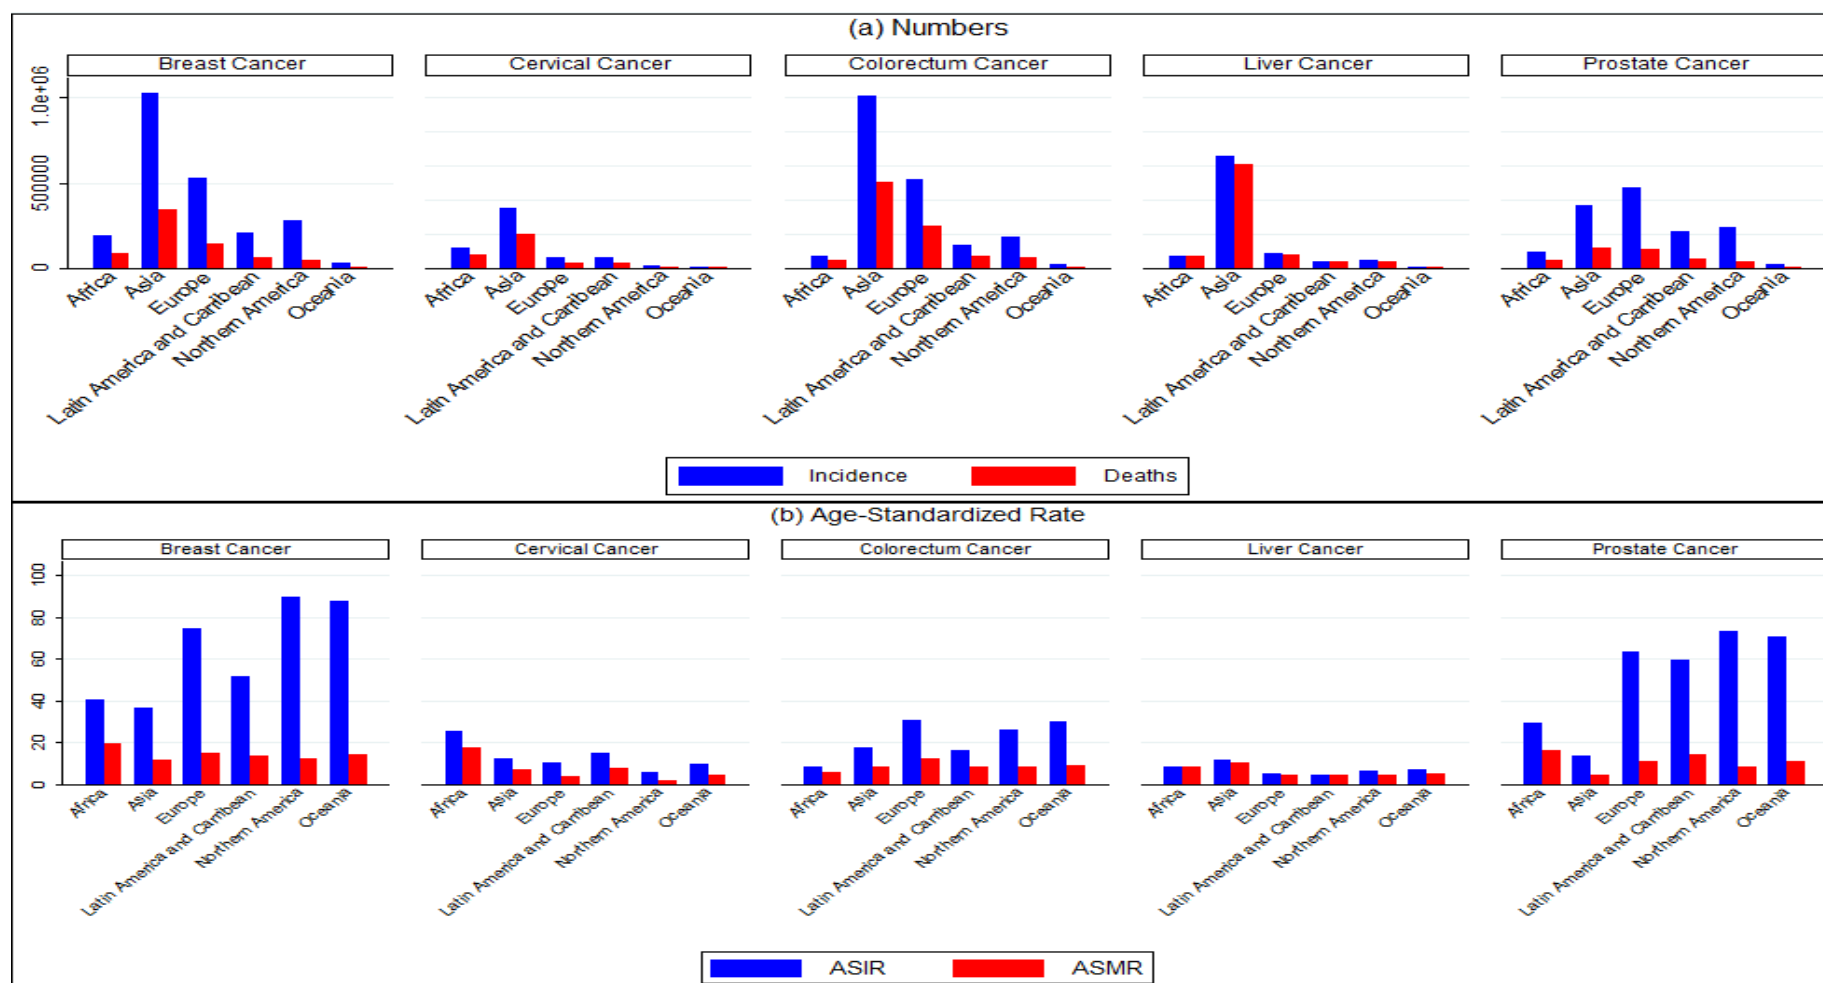

**Supplementary Figure 6 Comparison of Africa with Other Continents in terms of Top-5 Cancer Groups. a) Numbers b) Age-Standardized Rates.**

Incidence: All-age new cases; Deaths: All-age deaths; ASIR: Age-standardized incidence rate (cases per 100 000); ASMR: Age-standardized mortality rate (deaths per 100 000); MIR: Mortality-to-incidence ratio. Data Source: GLOBOCAN 2020 (International Agency for Research on Cancer).

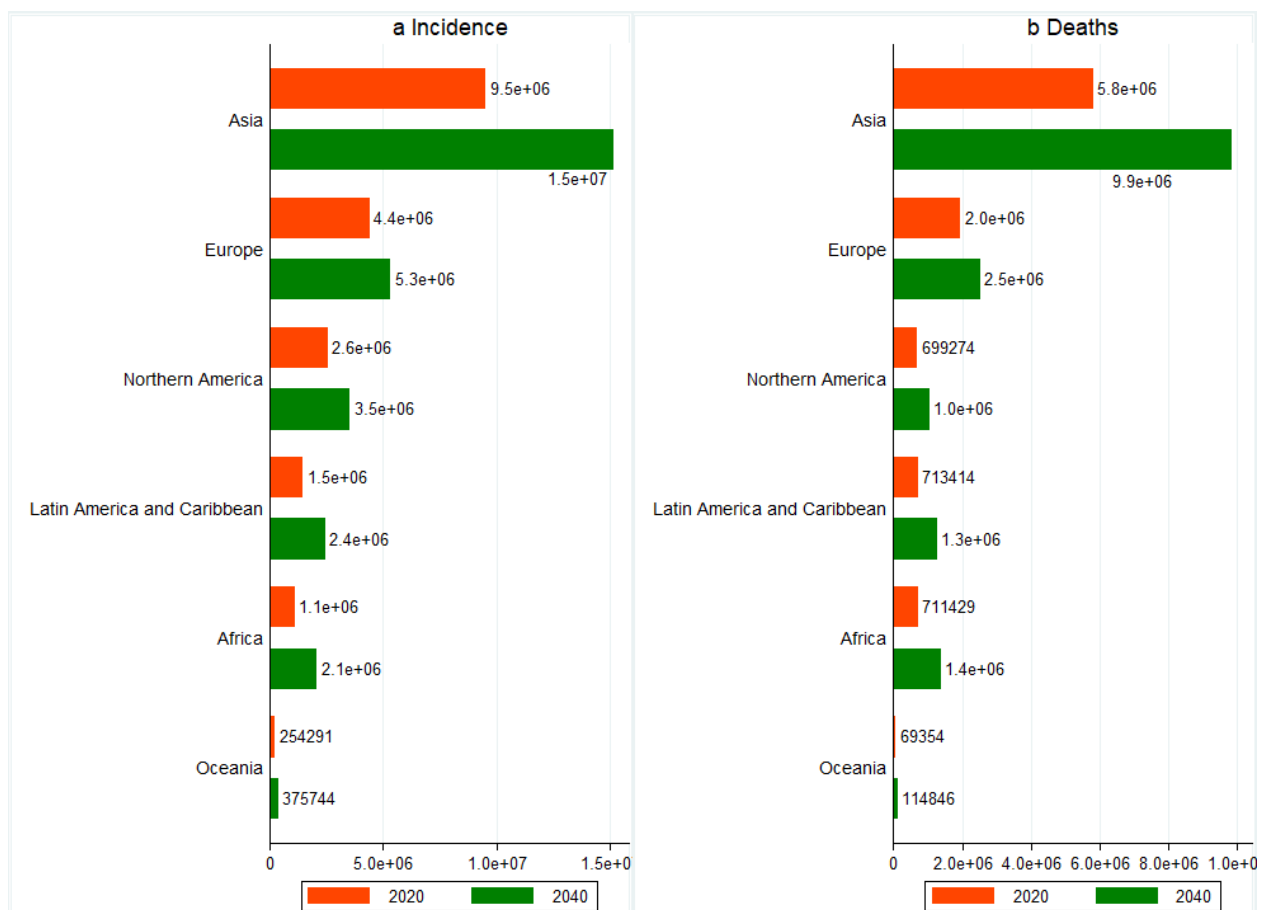

**Supplementary Figure 7 Comparison of Cancer Burden in Africa with other WHO Regions in 2020 and Forecasted Values in 2040. a) Incidence b) Deaths.**

Data Source: GLOBOCAN 2020 (International Agency for Research on Cancer).
